# 1 Gut Bacterial Dysbiosis and Instability is Associated with the Onset of 2 Complications and Mortality in COVID-19

3  
4 **David Schult<sup>1\*</sup>, Sandra Reitmeier<sup>2,3\*</sup>, Plamena Koyumdzhieva<sup>1\*</sup>, Tobias Lahmer<sup>1</sup>, Moritz**  
5 **Middelhoff<sup>1</sup>, Johanna Erber<sup>1</sup>, Jochen Schneider<sup>1</sup>, Juliane Kager<sup>1</sup>, Marina Frolova<sup>1</sup>, Julia**  
6 **Horstmann<sup>1</sup>, Lisa Fricke<sup>1</sup>, Katja Steiger<sup>4</sup>, Moritz Jesinghaus<sup>4,5</sup>, Klaus-Peter Janssen<sup>6</sup>, Ulrike**  
7 **Protzer<sup>7</sup>, Klaus Neuhaus<sup>2</sup>, Roland M. Schmid<sup>1</sup>, Dirk Haller<sup>2,3</sup>, Michael Quante<sup>1,8</sup>**

8  
9 **\*shared co-first authorship.**

10  
11 <sup>1</sup>Department of Internal Medicine II, Klinikum rechts der Isar, Technische Universität  
12 München, Munich, Germany; <sup>2</sup>ZIEL - Institute for Food & Health, Technische Universität  
13 München, Freising, Germany; <sup>3</sup>Chair of Nutrition and Immunology, Technische Universität  
14 München, Freising, Germany; <sup>4</sup>Institute of Pathology, Technische Universität München,  
15 Munich, Germany; <sup>5</sup>Institute of Pathology, University Hospital Marburg, Marburg, Germany;  
16 <sup>6</sup>Department of Surgery, Klinikum rechts der Isar, Technische Universität München, Munich,  
17 Germany; <sup>7</sup>Institute of Virology, Technische Universität/Helmholtz Zentrum München,  
18 Munich, Germany; <sup>8</sup>Department of Internal Medicine II, Universitätsklinikum Freiburg,  
19 Universität Freiburg, Freiburg, Germany.

20  
21 **Correspondence to:** Michael Quante, Klinik für Innere Medizin II, Universität Freiburg,  
22 Hugstetter Str. 55, Freiburg 79106, Germany. Phone: 49.761.270.32766; Email:  
23 michael.quante@uniklinik-freiburg.de

24  
25 **Word Count:** 3977

26

27

28

29

30

31

## 32 **Abstract**

33 **Objective:** There is a growing debate about the involvement of the gut microbiome in COVID-  
34 19, although it is not conclusively understood whether the microbiome has an impact on  
35 COVID-19, or vice versa, especially as analysis of amplicon data in hospitalized patients  
36 requires sophisticated cohort recruitment and integration of clinical parameters. Here, we  
37 analyzed fecal and saliva samples from SARS-CoV-2 infected and post COVID-19 patients and  
38 controls considering multiple influencing factors during hospitalization. **Design:** 16S rRNA  
39 gene sequencing was performed on fecal and saliva samples from 108 COVID-19 and 22 post  
40 COVID-19 patients, 20 pneumonia controls and 26 asymptomatic controls. Patients were  
41 recruited over the first and second corona wave in Germany and detailed clinical parameters  
42 were considered. Serial samples per individual allowed intra-individual analysis. **Results:** We  
43 found the gut and oral microbiota to be altered depending on number and type of COVID-19-  
44 associated complications and disease severity. The occurrence of individual complications was  
45 correlated with low-risk (e.g., *Faecalibacterium prausnitzii*) and high-risk bacteria (e.g.,  
46 *Parabacteroides*). We demonstrated that a stable gut bacterial composition was associated with  
47 a favorable disease progression. Based on gut microbial profiles, we identified a model to  
48 estimate mortality in COVID-19. **Conclusion:** Gut microbiota are associated with the  
49 occurrence of complications in COVID-19 and may thereby influencing disease severity. A  
50 stable gut microbial composition may contribute to a favorable disease progression and using  
51 bacterial signatures to estimate mortality could contribute to diagnostic approaches.  
52 Importantly, we highlight challenges in the analysis of microbial data in the context of  
53 hospitalization.

54

## 55 **Introduction**

56 The global pandemic caused by the new severe acute respiratory syndrome coronavirus 2  
57 (SARS-CoV-2) brought the health systems to its limitations. The disease is characterized by  
58 respiratory symptoms although there is increasing evidence of gastrointestinal (GI) tract  
59 involvement[1, 2, 3]. At 15-39%, nausea, vomiting, and diarrhea are relatively common in  
60 COVID-19[4] and a proportion of patients reports only gastrointestinal symptoms[5]. The virus  
61 itself is not limited to the lungs but replicates in human enterocytes[6] and is detectable in the  
62 patients' fecal samples[1, 7]. GI symptoms in patients with COVID-19 appear to be associated  
63 with increased disease severity and complications[8], although the underlying causes are not  
64 understood. Recent studies suggest that an altered microbial composition correlates with  
65 COVID-19 disease severity and inflammatory response to the disease[9, 10].  
66 Common complications of COVID-19 include venous thromboembolism[11, 12],  
67 hemodynamic instability[13], and acute kidney injury[14]. Particularly in severe cases, an  
68 excessive and prolonged immune response to the virus is thought to be a catalyst of severity[15,  
69 16].  
70 The composition of the gut microbiota plays a critical role in the immunological homeostasis  
71 of the human body[17, 18]. It is known that the microbiome of the human gut is sensitive to  
72 changes in the hosts' environment[19]. In addition to antibiotic use, diet[20], and geographical  
73 differences[21, 22], critically ill patients show a rapid depletion of health-promoting  
74 organisms[23].  
75 The study examined the impact of gut and oral microbiota on complication rate and outcome  
76 and, conversely, how hospitalization affects the gut microbial composition in this cohort.

77

## 78 **MATERIAL AND METHODS**

### 79 **Study Cohorts**

80 The study population consists of 4 groups: (1) 108 patients with laboratory confirmed SARS-  
 81 CoV-2 infection, (2) 22 patients post COVID-19 who had cleared the virus and were tested  
 82 negative at first sampling, (3) 20 symptomatic pneumonia controls (SC) and (4) 26 age and  
 83 gender matched asymptomatic controls (AC) (**Table 1, Figure 1 A**). Altogether, 251 stool  
 84 samples and 160 saliva samples were examined. Serial samples were collected to investigate  
 85 intra-individual changes over time. A total of 25 and 15 COVID-19 patients, 11 and 5 post  
 86 COVID-19 patients and 3 and 2 SC provided serial stool and saliva samples, respectively  
 87 (**Table 1**). The SC patients were admitted with respiratory symptoms of community-acquired-  
 88 pneumonia (CAP) and were tested negative for SARS-CoV-2. Patients in the AC group were  
 89 considered SARS-CoV-2 negative as they presented mainly for screening colonoscopy and  
 90 showed no symptoms of SARS-CoV-2 infection. To minimize potential influencing factors on  
 91 the microbiota in the AC cohort, patients with active cancer, inflammatory bowel disease (IBD),  
 92 oncologic therapy or antibiotic intake at the time of examination or within 6 months prior were  
 93 excluded. Endoscopic examination and pathology reports from colon biopsies had to be  
 94 unremarkable.

|                                                | COVID-19  | POST COVID-19 | SC      | AC       |
|------------------------------------------------|-----------|---------------|---------|----------|
| <i>NUMBER OF PATIENTS (N)</i>                  | 108       | 22            | 20      | 26       |
| <i>STOOL SAMPLES (N)</i>                       | 150       | 60            | 15      | 26       |
| <i>PATIENTS WITH SERIAL STOOL SAMPLES (N)</i>  | 25        | 11            | 3       | 0        |
| <i>SALIVA SAMPLES (N)</i>                      | 117       | 24            | 19      | 0        |
| <i>PATIENTS WITH SERIAL SALIVA SAMPLES (N)</i> | 15        | 5             | 2       | 0        |
| <i>GENDER (FEMALES:MALES)</i>                  | 49:59     | 4:18          | 5:15    | 11:15    |
| <i>AGE (YEARS, MEAN, SD)</i>                   | 62 (15)   | 65 (13)       | 64 (17) | 63 (12)  |
| <i>COMORBIDITIES (N, %)</i>                    |           |               |         |          |
| HYPERTENSION                                   | 43 (39.8) | 14 (63.6)     | 9 (45)  | 4 (15.4) |
| DIABETES MELLITUS II                           | 19 (17.6) | 5 (22.7)      | 3 (15)  | 3 (11.5) |
| CORONARY HEART DISEASE                         | 16 (14.8) | 3 (13.6)      | 8 (40)  | 1 (3.8)  |
| CHRONIC KIDNEY DISEASE                         | 9 (8.3)   | 7 (31.8)      | 3 (15)  | 1 (3.8)  |
| CANCER                                         | 9 (8.3)   | 3 (13.6)      | 5 (25)  | 0 (0)    |
| CHRONIC OBSTRUCTIVE LUNG DISEASE               | 5 (4.6)   | 1 (4.5)       | 1 (5)   | 0 (0)    |
| CHRONIC HEART FAILURE                          | 5 (4.6)   | 0 (0)         | 4 (20)  | 0 (0)    |
| DIVERTICULAR DISEASE                           | 4 (3.7)   | 1 (4.5)       | 0 (0)   | 12 (46)  |
| S.P. INTESTINAL RESECTION                      | 4 (3.7)   | 0 (0)         | 0 (0)   | 1 (3.8)  |
| RHEUMATIC DISEASE                              | 4 (3.7)   | 2 (9)         | 1 (5)   | 1 (3.8)  |
| INFLAMMATORY BOWEL DISEASE                     | 3 (2.8)   | 0 (0)         | 0 (0)   | 0 (0)    |
| GASTRITIS                                      | 3 (2.8)   | 1 (4.5)       | 0 (0)   | 4 (15.4) |
| REFLUX DISEASE                                 | 2 (1.9)   | 1 (4.5)       | 0 (0)   | 1 (3.8)  |
| <i>SYMPTOMS AT ADMISSION (N, %)</i>            |           |               |         |          |
| COUGH                                          | 69 (63.9) | 13 (5.9)      | 7(35)   | 0 (0)    |
| FEVER                                          | 63 (58.3) | 15 (68.2)     | 6 (30)  | 0 (0)    |
| DYSPNOEA                                       | 52 (48)   | 9 (10.9)      | 9 (45)  | 0 (0)    |

|                                                    |           |           |         |         |
|----------------------------------------------------|-----------|-----------|---------|---------|
| DIARRHEA                                           | 18 (16.7) | 7 (31.8)  | 0 (0)   | 0 (0)   |
| ANOSMIA/AGEUSIA                                    | 17(15.7)  | 1 (4.5)   | 0 (0)   | 0 (0)   |
| NAUSEA                                             | 17 (15.7) | 6 (27.3)  | 1 (5)   | 0 (0)   |
| <i>COMPLICATIONS DURING HOSPITALIZATION (N, %)</i> |           |           |         |         |
| ACUTE RESPIRATORY DISTRESS SYNDROME                | 21 (19.4) | 13 (59)   | 2 (10)  | 0 (0)   |
| ACUTE KIDNEY INJURY                                | 17 (15.7) | 12 (54.5) | 4 (20)  | 0 (0)   |
| ACUTE CARDIAC EVENT                                | 2 (1.9)   | 1 (4.5)   | 0 (0)   | 0 (0)   |
| ACUTE PULMONARY EMBOLISM                           | 4 (3.7)   | 0 (0)     | 0 (0)   | 0 (0)   |
| SHOCK                                              | 3 (2.8)   | 3 (13.6)  | 1 (5)   | 0 (0)   |
| PANCREATITIS                                       | 2 (1.9)   | 0 (0)     | 0 (0)   | 0 (0)   |
| VENOUS THROMBOEMBOLISM                             | 3 (2.8)   | 1 (4.5)   | 1 (5)   | 0 (0)   |
| STROKE                                             | 1 (0.9)   | 0 (0)     | 1 (5)   | 0 (0)   |
| <i>SECONDARY INFECTIONS (N, %)</i>                 |           |           |         |         |
| ANTIBIOTICS (N, %)                                 | 54 (50)   | 19 (86.4) | 17 (85) | 0 (0)   |
| <i>OXYGEN SUPPORT WITHOUT VENTILATION (N, %)</i>   |           |           |         |         |
| VENTILATION SUPPORT (N, %)                         | 24 (22.2) | 14 (63.6) | 5 (25)  | 0 (0)   |
| <i>ARTIFICIAL NUTRITION (N, %)</i>                 |           |           |         |         |
| INTENSIVE CARE (N, %)                              | 17(16)    | 12 (54.5) | 5 (25)  | 0 (0)   |
| <i>IMMUNOSUPPRESSION (N, %)</i>                    |           |           |         |         |
| SPECIFIC CANCER THERAPY (N, %)                     | 30 (27.8) | 15 (68.2) | 5 (25)  | 0 (0)   |
| <i>SPECIFIC SARS-COV-2-TREATMENT (N, %)</i>        |           |           |         |         |
| REMDESIVIR                                         | 40 (37)   | 5 (22.7)  | 3 (15)  | 2 (7.7) |
| SPECIFIC SARS-COV-2-TREATMENT (N, %)               | 5 (4.6)   | 2 (9)     | 2 (10)  | 0 (0)   |
| REMDESIVIR                                         | 15 (13.9) | 4 (18.2)  | 0 (0)   | 0 (0)   |
| CONVALESCENT PLASMA                                | 5 (4.6)   | 1 (4.5)   | 0 (0)   | 0 (0)   |
| INTRAVENOUS IMMUNOGLOBULINS                        | 1 (0.9)   | 0 (0)     | 0 (0)   | 0 (0)   |
| BARICITINIB                                        | 1 (0.9)   | 0 (0)     | 0 (0)   | 0 (0)   |

95  
96  
97

**Table 1** Demographic and Clinical Characteristics of the Study Population

98 **Patient Recruitment and Sampling**

99 Acquisition of patients was conducted at the university hospital Klinikum rechts der Isar,  
100 Technical University Munich, Germany. COVID-19 patients, post COVID-19 patients and SC  
101 were prospectively recruited between April 2020 to July 2020 (first COVID-19 wave in  
102 Germany) and August 2020 to December 2020 (second COVID-19 wave in Germany), whereas  
103 the AC group was prospectively recruited between August 2019 and October 2020. Because  
104 these were control patients in an intestinal microbiome-only study, saliva was not obtained  
105 (**Figure 1 A**). Stool, saliva and blood samples were collected at least once per week during the  
106 inpatient stay. To ensure follow-up and bio-sample collection after discharge, patients were  
107 invited to follow-up visits. SARS-CoV-2 infection was confirmed by quantitative reverse  
108 transcription PCR (RT-qPCR), performed on nasopharyngeal swabs. For the post COVID-19  
109 patients the first stool sample was collected on average 30 days after the negative PCR. In the  
110 AC group, stool samples were collected either before or 6 weeks after bowel preparation for  
111 colonoscopy. To characterize the disease activity, laboratory parameters and data regarding

112 fraction of inspired oxygen (FiO<sub>2</sub>), ventilation mode, diet, intensive or normal ward and  
113 antibiotic use were collected at each time point of stool or saliva sampling.

114

### 115 **Classifications**

116 Patients with COVID-19 or post COVID-19 were classified into 3 groups based on the WHO  
117 ordinal scale for clinical improvement for hospitalized patients with COVID-19[24], which has  
118 been used in other COVID-19 studies[25]: (i) mild disease, composed of patients with no  
119 oxygen therapy (score 3) or oxygen by mask or nasal prongs (score 4); (ii) severe disease,  
120 including patients requiring non-invasive ventilation or high-flow oxygen (score 5), intubation  
121 and mechanical ventilation (score 6) or ventilation and additional organ support (score 7), and  
122 (iii) fatal disease (death, score 8). Ventilation mode during inpatient stay was divided in two  
123 groups: (i) Oxygen via nasal prongs, and (ii) mechanically ventilated either pressure controlled  
124 (PC) or pressure assisted (PA) and tracheostomy (TS) after long period of intubation.  
125 Considering the varying impact of different antibiotics on the gut microbiota, antibiotic therapy  
126 was classified according to their spectrum of activity (**Supplementary Table 1**). Patients were  
127 either fed normally or with formulated food via gastric tube in combination with or without  
128 parenteral nutrition (summarized in tube feeding).

129

### 130 **Ethical Approval**

131 All patients provided written informed consent. The study was conducted in accordance with  
132 the declaration of Helsinki and approved by the ethics committee of the Technical University  
133 Hospital of Munich (221/20 S-SR).

134

### 135 **Sample Preparation and 16S rRNA Gene Sequencing**

136 Faecal and saliva samples were stored in a solution to stabilize DNA (MaGix PBI, Microbiomix  
137 GmbH, Regensburg Germany). Sample preparation and paired-end sequencing was performed

138 on an Illumina MiSeq targeting the V3V4 region of the 16S rRNA gene. Detailed description  
139 of the methods is published[26]. Raw FASTQ files were processed using the NGSToolkit  
140 (<https://github.com/TUM-Core-Facility-Microbiome/ngstoolkit>) based on USEARCH 11[27]  
141 to generate denoised zero-radius operational-taxonomic units (zOTUs).

142

### 143 **Statistical Analysis**

144 Differences in relative abundance of taxa and/or zOTUs were determined by Kruskal-Wallis  
145 Rank Sum test for multiple groups and Wilcoxon Rank Sum test for pairwise comparison.  
146 Differences in prevalence were determined by a non-linear Fisher Exact test. Spearman  
147 correlation was calculated for associations and continuous variables.

148 Similarity between samples was estimated based on a distance matrix using generalized  
149 UniFrac. Significance between groups, effect modifier, and confounder were determined by a  
150 permutational multivariate analysis of variances (*adonis* function of the R-package *vegan*).

151 For all analyses, p-values were corrected for multiple testing according to Benjamini-Hochberg  
152 correction.

153 The explained variation of co-variables was determined by calculating  $R^2$  values and were  
154 considered as significant with a p-value  $\leq 0.05$ . A *random forest* model was used to classify  
155 binary outcome variables based on microbial composition with a 5-fold cross validation by  
156 using *randomForest* from the R package *randomForest* v4.6-14. To receive a robust and  
157 generalizable classification model, the machine-learning algorithm was applied 100-times  
158 iteratively. Based on out-of-bag error rates and Gini index, the most important features were  
159 selected for each iteration using *rfcv* from the R package *randomForest* v4.6-14. Features, which  
160 appeared in all 100 random forest models, were considered as classification features for the  
161 final model. A generalized linear model for binomial distribution and binary outcome (logit)  
162 was generated using the previously selected features.

163

## 164 **RESULTS**

### 165 **Association of SARS-CoV-2 Status with the Gut Microbiota**

166 Analysis of the gut microbiota was performed on 251 stool samples ( $n = 251$ ) from 144 patients  
167 ( $N = 144$ ), of which were 86 COVID-19 patients ( $n = 150$  samples), 21 post COVID-19 patients  
168 ( $n = 60$ ), 11 SC ( $n = 15$ ) and 26 AC ( $n = 26$ ) (**Figure 1 A**). No bias due to sampling phases was  
169 observed allowing a combined analysis of the two COVID-19 waves.

170 Phylogenetic analysis of patient's microbial profile showed no cluster according to SARS-CoV-  
171 2 status. Nevertheless, some patients were found to have an increased relative abundance of  
172 Proteobacteria which was mainly observed with COVID-19 and post COVID-19 samples  
173 (**Figure 1 C**). The analysis of *alpha*-diversity revealed a not normally distributed number of  
174 observed species and bacterial diversity (**Figure 1 B**). The number of observed species was  
175 reduced in active COVID-19 (richness  $133 \pm 90$ ) and post COVID-19 patients (richness  $103 \pm$   
176  $60$ ) compared to AC (richness  $219 \pm 68$ ), and bacterial diversity showed a reduced Shannon  
177 effective number in SC (**Figure 1 D**).

178 Considering only the first sampling time point (T1) per individual revealed that parameters  
179 related to patient's health were important effect modifiers (**Figure 1 D**). Interestingly, even  
180 though the SARS-CoV-2 status alone did not show a clear pattern in the phylogenetic tree, the  
181 detection of SARS-CoV-2 in nasopharyngeal swabs significantly influenced the gut microbiota  
182 ( $R^2 = 0.04$ ,  $p = 0.001$ ), as well as disease related variables, e.g. the disease severity ( $R^2 = 0.05$ ,  
183  $p = 0.001$ ).

184

### 185 **Evaluation of Confounding Factors**

186 Although variables known to influence the microbial composition of the gut such as antibiotics  
187 or chemotherapy, appeared to be significant influencing factors (**Figure 1 D**), none of the tested  
188 variables were confounders within the analysed cohort (**Supplementary Table 2**). Particular  
189 attention was paid to variables related to hospitalization such as artificial feeding, critical care



190 and antibiotic treatment. Since most patients were treated with different groups of antibiotics,  
191 we could not elucidate the influence of a specific antibiotic subgroup on the composition of the  
192 gut microbiota. Additionally, patients' comorbidities and disease history was tested for  
193 confounding, considering type 2 diabetes[28, 29], inflammatory bowel disease[30], cancer, as  
194 well as chemotherapy and immunotherapy[31] within 6 months before stool sampling, or bowel  
195 resection[32] (**Supplementary Table 3**). We further tested whether age and gender, specific  
196 SARS-CoV-2 treatment (remdesivir, convalescent plasma, intravenous immunoglobulins, or  
197 baricitinib), immunosuppressive therapy, or secondary infections introduced bias in the  
198 microbial analysis. Of note, critically ill patients with complications, compared to mild courses,  
199 were mainly treated at the ICU and received antibiotics (**Supplementary Table 4**). However,  
200 within the cohort none of the above mentioned variables had a confounding effect in the  
201 analysis of the microbial composition related to COVID-19.

202

### 203 **Disease Severity and Progression Are Related to Altered Gut Microbiota**

204 Disease severity according to WHO ordinal scale for clinical improvement significantly  
205 influences the gut bacterial composition of stool samples ( $p = 0.001$ ) (**Figure 2 A**). *Beta*-  
206 diversity clearly demonstrated a shift of bacterial profiles comparing controls with COVID-19  
207 and post COVID-19 patients. Thereby, the bacterial composition of patients with a mild disease  
208 was more similar to SC and AC and a more severe disease showed a microbial composition  
209 more similar to patients who died due to COVID-19. A number of stool samples clustered  
210 independently in patients with severe and fatal COVID-19 disease, as well as a few mild courses  
211 and SC (**Figure 2 A**, left cluster). However, patients with mild disease in this cluster, or SC,  
212 showed no similarities for clinical or laboratory parameters with severe cases. None of the AC  
213 samples fell within this cluster.

214 Differentiation analysis revealed zOTUs (**Supplementary Table 5**), which were significantly  
215 different between study groups and correlated with markers of inflammation, such as white

216 blood cells counts (WBC), C-reactive protein (CRP) and procalcitonin (PCT) (**Figure 2 B**).  
217 Here, *Clostridium innocuum* (zOTU62), *Ruthenibacterium lactatiformans* (zOTU29), and  
218 *Alistipes finegoldii* (zOTU64) correlated positively with inflammatory markers and continue to  
219 show a significantly increased relative abundance or prevalence in patients with a severe disease  
220 progression. Negatively correlated zOTUs were significantly decreased in severe and fatal cases  
221 of COVID-19 and post COVID-19, such as *Faecalibacterium prausnitzii* (zOTU20), *Blautia*  
222 *luti* (zOTU6), *Dorea longicatena* (zOTU32), *Gemmiger formicilis* (zOTU30), and *Alistipes*  
223 *putredinis* (zOTU33). In addition, *Fusicatenibacter* showed a significantly reduced prevalence  
224 in severe cases and was totally absent in patients who died (**Figure 2 B**). On the other hand,  
225 *Parabacteroides* significantly increased with a more severe disease (**Figure 2 B**). *Beta-*  
226 diversity already showed some accumulation of patients with an increased relative abundance  
227 of Protobacteria (**Figure 1 B**), which was also found to be increased in severe COVID-19 cases  
228 (**Figure 2 B**).

229 To analyse the associations of the gut microbial composition with COVID-19 severity in greater  
230 depth, we defined a subset of patients with certain criteria. This included patients presenting  
231 with high inflammatory parameters (CRP  $\geq$  10 mg/dl, PCT  $\geq$  5 ng/ml, WBC  $\geq$  15 G/l), FiO<sub>2</sub>  $\geq$   
232 40%, requiring mechanical ventilation (PC, PA, TS), were treated at the ICU, and had at least  
233 one complication. In addition, WHO disease severity was set to  $\geq$ 6. Overall, 15 male patients  
234 met the criteria (COVID-19, N = 8; post COVID-19, N = 7) and all of them died, 13 due to  
235 acute respiratory distress syndrome (ARDS) and 2 of them due to cerebral haemorrhage.

236 Stratification according to disease severity showed that the microbial profile of severe and fatal  
237 cases clustered together. These profiles were mainly dominated by an increased relative  
238 abundance of *Parabacteroides*, *Lachnoclostridium*, and a reduced relative abundance of  
239 *Blautia*, *Faecalibacterium*, and *Ruminococcus* (**Figure 2 C**), which were shown to be  
240 underrepresented in COVID-19[9]. There were no significant differences in the bacterial  
241 composition between COVID-19 or post COVID-19 patients. Interestingly, AC showed a

242 higher abundance of *Coprococcus*, previously demonstrated to be associated with non COVID-  
243 19 patients[10], and *Roseburia*, which were reported to be more prevalent in healthy individuals  
244 compared to COVID-19 patients[9].

245

#### 246 **Microbial Analysis of Saliva Samples**

247 Alterations in the oral microbiome have previously been associated with COVID-19 and  
248 suggested as a diagnostic marker[33]. To comprehensively analyse the oro-intestinal bacterial  
249 composition, saliva samples were collected in addition to fecal samples (**Figure 1 A,**  
250 **Supplementary Table 6**). In total, 160 saliva samples from 117 patients were analysed  
251 (COVID-19, N = 87, n = 117; post COVID-19, N = 13, n = 24; SC, N = 17, n = 19). Taxonomic  
252 differences on phyla level are minor with a reduced relative abundance of *Firmicutes* in  
253 COVID-19 compared to post COVID-19 and SC. Post COVID-19 showed an increased relative  
254 abundance of *Proteobacteria* and a reduction in *Actinobacteria*. Compared to SC, post COVID-  
255 19 and COVID-19 had an increased abundance of *Fusobacteria* (**Supplementary Figure 1 A**).  
256 Overall, microbial composition between the groups showed no significant differences  
257 (**Supplementary Figure 1 B**). Interestingly, in accordance with our findings regarding the gut  
258 bacteria, stratification of patients according to disease severity showed a significant difference  
259 in the composition of the oral microbiome ( $p = 0.003$ ) (**Supplementary Figure 1 C**) as well as  
260 significant variations according to the number of complications ( $p = 0.001$ ) (**Supplementary**  
261 **Figure 1 D**). However, a random forest model failed to predict mortality in the setting of  
262 COVID-19-associated hospitalization for saliva samples.

263

#### 264 **Alterations of the Gut Microbiota Correlate with Number and Type of Complications**

265 Following the association between severity and changes in the gut microbiota, we further  
266 investigated whether microbial changes were found in terms of type and number of  
267 complications in COVID-19 and post COVID-19 patients and SC. A maximum of three

268 complications per patient were observed. Stratifying patients according to the number of  
269 complications revealed a significant distinction between patients with no complications and  
270 patients with one or more complications, with a shift in their bacterial profile according to the  
271 number of complications ( $p = 0.002$ ) (**Figure 3 A**). Furthermore, *alpha*-diversity showed that  
272 the abundance of gut bacteria decreased with the number of complications (**Figure 3 B**).  
273 Interestingly, *F. prausnitzii* was found to be reduced with an increased number of complications  
274 and absent in patients with three complications (**Figure 3 B**). Consistent with the findings  
275 regarding disease severity (**Figure 2 B**), *Parabacteroides* was increased in patients with a more  
276 complicated course (**Figure 3 B**).

277 Some complications showed overlapping bacteria, which were significantly different in their  
278 relative abundance compared to patients without the corresponding complication. Patients who  
279 developed ARDS, AKI, or had hemodialysis, revealed a significantly reduced gut bacterial  
280 richness as well as Shannon effective number, which was also seen in patients with an acute  
281 cardiac event (**Figure 3 C**). Specific complications were associated with changes in the relative  
282 abundance of individual bacteria (**Figure 3 C**). Hereby, the butyrate producing *F. prausnitzii*  
283 was significantly reduced in patients with ARDS, AKI, hemodialysis, and acute cardiac events  
284 and furthermore negatively associated with mortality. *Blautia* was reduced for most  
285 complications except in patients with VTE/PE or AKI. *Parabacteroides*, on the other hand, was  
286 increased in patients with ARDS and hemodialysis and showed a positive association with  
287 mortality. Multivariate permutational analyses showed that AKI had the greatest influence on  
288 microbial changes, followed by ARDS, acute cardiac events and VTE. However, pancreatitis  
289 and stroke were not significantly contributing to microbial differences (**Figure 3 D**).

290

### 291 **A Stable Gut Bacterial Composition is Correlated with A Favourable Disease Progression**

292 During this study, 39 patients (COVID-19, post COVID-19, and SC) provided more than one  
293 stool sample, enabling the analysis of intra-individual changes during disease course. Based on

294 generalized UniFrac distances the stability of the microbial composition of the gut was  
295 determined (**Figure 4 A**). On average, the intra-individual distance was  $0.33 \pm 0.09$ . The  
296 microbial composition was equally dynamic between COVID-19, post-COVID-19, and SC.  
297 Compositional changes were not related with ward, nutrition, antibiotics, or disease severity.  
298 Stratifying the longitudinal data according to the number of complications supported our  
299 previous results (**Figure 3 A**) that the onset of complications during inpatient stay significantly  
300 correlated with an altered bacterial composition ( $p = 0.001$ ) (**Figure 4 B**). Even though the  
301 intra-individual distance showed no obvious grouping based on SARS-CoV-2 status, a cluster  
302 could be detected according to the simple presence or absence of complications. COVID-19  
303 patients without any complication had a more stable microbial composition compared to  
304 patients with complications (**Figure 4 C**). Analysis of the intra-individual microbial stability  
305 accounting for varying conditions, demonstrated the significance of environmental factors in  
306 addition to the disease state. In the context of intra-individual examination of the bacterial  
307 profiles over time, disease progression could be tracked using inflammation markers (CRP,  
308 PCT, WBC) and oxygen demand (FiO<sub>2</sub>) at the time of each stool sample. Thus, we defined a  
309 group of COVID-19 and post COVID-19 patients with severe progression. Criteria for a severe  
310 progression had to be met at least for one sampling time point (CRP  $\geq 10$  mg/dl, PCT  $\geq 5$  ng/ml,  
311 WBC  $\geq 15$  G/l, FiO<sub>2</sub>  $\geq 40\%$ ) and we compared this group (S-prog, N = 44) with patients not  
312 meeting these criteria (NS-prog, N = 62). Indeed, the bacterial composition of S-prog  
313 significantly differed from NS-prog (**Figure 4 D**).

314 Additionally, machine learning was applied to differentiate between S-prog and NS-prog.  
315 Towards this end, a random forest model was trained on COVID-19 patients in a 10-fold cross-  
316 validated nested approach (repeated 100 times). In total, 12 zOTUs were selected as important  
317 features: *Enterococcus durans* (zOTU1), *Streptococcus thermophilus* (zOTU119, zOTU25),  
318 *Citrobacter freundii* (zOTU137, zOTU76), *Holdemanian massiliensis* (zOTU293),  
319 *Parabacteroides distasonis* (zOTU31), *D. longicatena* (zOTU32), *Lactococcus lactis*

320 (zOTU442), *Blautia* spp. (zOTU54, zOTU6), *Lacticaseibacillus rhamnosus* (zOTU924)  
321 (**Figure 4 D, Supplementary Table 5**). The defined signature was overlapping with zOTUs  
322 associated with disease severity within our patient population (**Figure 2 B**). Based on this  
323 bacterial signature, a generalized linear model of all patients revealed an area under the curve  
324 (AUC) of 0.94 to predict mortality during the COVID-19 associated inpatient stay (**Figure 4**  
325 **D**). The specificity was verified by applying the signature to other outcomes, e.g. type 2 diabetes  
326 (AUC = 0.76) or presence of complications (AUC = 0.82).

327

## 328 DISCUSSION

329 The risk of a severe disease course and complications, including thromboembolism, renal  
330 failure, and acute cardiac events is higher for COVID-19 than for influenza[34]. GI symptoms  
331 in patients with COVID-19 are associated with an increased disease severity and  
332 complications[8] and an exaggerated immune response to the virus is considered to play a  
333 crucial role in driving disease progression[15, 16]. It is well known that gut microorganisms  
334 influence the systemic immune response of their hosts through multiple crosstalk with immune  
335 cells[35, 36, 37].

336 In our study, we demonstrated that the bacterial composition of the gut in patients with COVID-  
337 19 disease changes with number and type of complications. Thereby, taxa known for protective  
338 and immunosuppressive properties were found to be decreased with an increasing complication  
339 rate, whereas rather pathogenic taxa were more prevalent. *F. prausnitzii*, for example, was  
340 undetectable in patients with three complications and relatively reduced in patients with AKI,  
341 hemodialysis, ARDS, cardiac event and was negatively correlated with mortality. This  
342 bacterium has anti-inflammatory properties[38, 39] and was found to have an inverse  
343 correlation with disease severity in COVID-19[9, 10]. On the other hand, the relative abundance  
344 of the genus *Alistipes* was increased with the number of complications. In terms of functionality,  
345 there is conflicting evidence to the protective or pathogenic potential of *Alistipes* in various

346 diseases[40]. In patients with thromboembolic complications the genus *Tyzzarella* was the only  
347 significantly elevated bacterium. Interestingly, *Tyzzarella* was previously shown to be  
348 associated with an increased risk of cardiovascular diseases[41]. *Parabacteroides* was  
349 increased in patients with ARDS and hemodialysis and related to mortality. The associations of  
350 individual bacteria with the occurrence of complications suggests a potential role of the gut  
351 microbiota in the development of specific complications within COVID-19 and provide  
352 additional evidence for an involvement of the gut concerning cardiovascular risk[42] and  
353 venous thromboembolism[43, 44].

354 In addition, differences in the bacterial composition were found dependent on the disease  
355 severity. While the microbial profile of patients with mild diseases was comparable to controls,  
356 severe and fatal cases showed marked differences with respect to protective bacteria. Congruent  
357 with previously published studies in other countries[1, 9, 10, 45], our results confirm a link  
358 between disease severity of COVID-19 and microbiota alterations in a large German cohort.  
359 Besides an inverse correlation of *F. prausnitzii* with disease severity of COVID-19[10], *Blautia*  
360 was previously shown to be underrepresented in patients with COVID-19 and was associated  
361 with SARS-CoV-2 recovery[9]. *Fusicatenibacter* was reported to be enriched in non COVID-  
362 19 controls[45] and correlated negatively with inflammatory biomarkers in COVID-19  
363 patients[46] and *Parabacteroides* correlated positively with disease severity[9].

364 To more deeply examine the associations of the gut bacteria with COVID-19 progression, we  
365 considered functional data, such as FiO<sub>2</sub>, at each time of stool collection. Thereby, the intra-  
366 individual microbial stability decreased with a higher complication rate. Based on a distinct  
367 microbial profile, the individual risk of mortality due to COVID-19 could be estimated. Thus,  
368 while disease severity, inflammatory activity, and complication rate were associated with  
369 changes in bacterial composition in COVID-19 patients, the impact of SARS-CoV-2 infection  
370 appears to be more modest, indicating that the gut plays a role in shaping severe disease  
371 progression.

372 Regarding the microbiota changes in the oral cavity, differences in bacterial composition related  
373 to severity and complications were observed, highlighting the importance of the bacterial oro-  
374 intestinal axis in COVID-19[33]. However, prediction of mortality was not feasible using  
375 bacterial patterns in saliva and the results were less conclusive compared to changes in the gut  
376 microbiota.

377 We hypothesize that changes in the microbial composition, especially of the gut, may drive  
378 disease, possibly via an involvement in the development of complications. A stable bacterial  
379 profile during hospitalization could have a favorable impact on disease progression. A healthy  
380 and diverse intestinal microbiota should, therefore, be considered in the therapeutic  
381 management of COVID-19.

382 Because of the often prolonged hospital stay of inpatients of 24 days on average within our  
383 cohort, multiple factors could influence the gut microbiota. These include formulated food,  
384 antibiotics, or catabolic metabolism during an ICU stay[47]. Especially in a clinically  
385 heterogeneous disease like COVID-19, these factors must be considered in the interpretation of  
386 microbiota analysis. For this reason, we carefully reviewed the results for potential  
387 confounders, including concomitant diseases and assessable factors associated with  
388 hospitalization. In this context, none of the factors examined was found to be a confounder with  
389 significant bias concerning our results. Nevertheless, patients with a severe and complicating  
390 disease, in contrast to mild cases, were mainly treated at the ICU and given antibiotics  
391 **(Supplementary Table 4)**. Thus, it cannot be ruled out that microbiota changes related to the  
392 severity and complications are also influenced by the conditions of medical treatment. It further  
393 remains unclear whether the changes in microbiota causally influenced the severity of COVID-  
394 19 and occurrence of complications, or vice versa.

395 Taken together, our results suggest that the gut and salivary microbiota are associated with the  
396 occurrence of individual complications in COVID-19, thereby influencing disease severity. A  
397 stable gut bacterial composition during hospitalization is associated with a more favorable



398 clinical course. Further studies are needed to investigate direct causality between gut bacterial  
399 dysbiosis and COVID-19 and to integrate microbial patterns for prognostic and therapeutic  
400 purposes in clinical routine.

401

402

403 **Conflict of Interest:** All authors have no conflict of interest to disclose.

404

405 **Acknowledgments:** We thank all the health care workers of Klinikum rechts der Isar as well  
406 as the CoMRI team around Christoph Spinner, MD. We are grateful to Angela Sachsenhauser,  
407 Caroline Ziegler and Lukas Mix from the Core Facility Microbiome of the ZIEL Institute for  
408 Food & Health for outstanding technical support in sample preparation and 16S rRNA gene  
409 amplicon sequencing

410

411 **Authorship Contributions:** David Schult, MD (Conceptualization: Lead; Project  
412 administration: Lead; Supervision: Lead; Investigation: Equal; Methodology: Lead;  
413 Visualization: Supporting; Validation: Equal; Manuscript – writing: Lead, Manuscript – review  
414 & editing: Lead), Sandra Reitmeier, PhD (Conceptualization: Equal; Project administration:  
415 Equal; Investigation: Equal; Methodology: Lead; Visualization: Lead; Validation: Equal;  
416 Manuscript – writing: Lead, Manuscript – review & editing: Lead; Formal analysis: Lead),  
417 Plamena Koyumdzhieva, cand. med. (Conceptualization: Equal; Investigation: Lead;  
418 Methodology: Supporting; Visualization: Supporting; Validation: Equal; Manuscript – writing:  
419 Equal, Manuscript – review & editing: Supporting), Tobias Lahmer, MD, Johanna Erber, MD,  
420 Marina Frolova, Julia Horstmann, Lisa Fricke, Juliane Kager, MD, Katja Steiger, MD, Moritz  
421 Jesinghaus, MD (Investigation: Supporting), Moritz Middelhoff, MD, Jochen Schneider, MD  
422 (Conceptualization: Supporting), Klaus-Peter Janssen, PhD (Resources: Supporting;  
423 Manuscript – review & editing: Supporting), Ulrike Protzer, MD (Resources: Supporting),  
424 Klaus Neuhaus, PhD (Resources: Equal; Validation: Supporting; Manuscript – review &  
425 editing: Equal), Roland M. Schmid, MD (Resources: Equal; Funding acquisition: Equal), Dirk  
426 Haller, PhD (Conceptualization: Supporting, Resources: Equal; Validation: Supporting;  
427 Funding acquisition: Equal; Manuscript – review & editing: Equal), Michael Quante, MD

428 (Conceptualization: Lead; Project administration: Equal; Supervision: Lead; Funding  
429 acquisition: Lead; Manuscript – review & editing: Lead).

430

431 **Data Availability and Data Transparency Statement:** FASTQ files of the 16S rRNA gene  
432 sequencing is available under SRA accession number PRJNA756849  
433 (<https://www.ncbi.nlm.nih.gov/bioproject/PRJNA756849/>).

434

435 **Keywords:** Coronavirus; SARS-CoV-2; Complications, Gut Microbiome; Oral Microbiome

436

437 **Funding:** Internal funds of Technical University of Munich to CoMRI (Cohort study for patients  
438 tested positive for SARS-CoV-2), Deutsche Forschungsgesellschaft (DFG) grant 395357507 -  
439 SFB 1371

440

441 **Abbreviations:** AB T1 = Antibiotic therapy at the time of the first stool sampling; AC =  
442 Asymptomatic controls; AKI = Acute kidney injury; AP = Alkaline phosphatase [U/l]; ARDS  
443 = Acute respiratory distress syndrome; Asympt. = Asymptomatic; COVID-19 = Corona virus  
444 disease 2019; CRP = C-reactive protein [mg/dl]; FiO<sub>2</sub> = Fraction of inspired oxygen (%); GGT  
445 = Gamma-Glutamyltransferase [U/l]; GI = Gastrointestinal; Hb = Hemoglobin [g/dl]; i.v. =  
446 intravenous; IBD = Inflammatory bowel disease; ICU = Intensive care unit; ICU all T =  
447 Intensive care stay regarding all time points of stool sampling; ICU T1 = Intensive care stay at  
448 the time of the first stool sampling; N = Number of patients; n = Number of samples; NA = not  
449 available; PA = Pressure assisted; PC = Pressure controlled; PCT = Procalcitonin [ng/ml]; PE =  
450 Pulmonary embolism; Rel. = Relative; S.p. = Status post; SARS-CoV-2 = Severe acute  
451 respiratory syndrome coronavirus 2; SC = Symptomatic pneumonia controls; Sig. = Significant;  
452 Sympt. = Symptomatic; T1 = First sampling time point; T2D = Type 2 diabetes mellitus; Trp T

453 = High-sensitive troponin T [ng/ml]; TS = Tracheostomy; VTE = Venous thromboembolism;

454 WBC = White blood cells counts [G/l]; zOTU = Zero-radiation operational-taxonomic units

455

456 **References**

- 457 1 Zuo T, Liu Q, Zhang F, Lui GC, Tso EY, Yeoh YK, *et al.* Depicting SARS-CoV-2  
458 faecal viral activity in association with gut microbiota composition in patients with COVID-  
459 19. *Gut* 2021;**70**:276-84.
- 460 2 Liang W, Feng Z, Rao S, Xiao C, Xue X, Lin Z, *et al.* Diarrhoea may be  
461 underestimated: a missing link in 2019 novel coronavirus. *Gut* 2020;**69**:1141-3.
- 462 3 Cheung KS, Hung IFN, Chan PPY, Lung KC, Tso E, Liu R, *et al.* Gastrointestinal  
463 Manifestations of SARS-CoV-2 Infection and Virus Load in Fecal Samples From a Hong  
464 Kong Cohort: Systematic Review and Meta-analysis. *Gastroenterology* 2020;**159**:81-95.
- 465 4 Wiersinga WJ, Rhodes A, Cheng AC, Peacock SJ, Prescott HC. Pathophysiology,  
466 Transmission, Diagnosis, and Treatment of Coronavirus Disease 2019 (COVID-19): A  
467 Review. *JAMA* 2020;**324**:782-93.
- 468 5 Mao R, Qiu Y, He JS, Tan JY, Li XH, Liang J, *et al.* Manifestations and prognosis of  
469 gastrointestinal and liver involvement in patients with COVID-19: a systematic review and  
470 meta-analysis. *Lancet Gastroenterol Hepatol* 2020;**5**:667-78.
- 471 6 Lamers MM, Beumer J, van der Vaart J, Knoops K, Puschhof J, Breugem TI, *et al.*  
472 SARS-CoV-2 productively infects human gut enterocytes. *Science* 2020;**369**:50-4.
- 473 7 Xu Y, Li X, Zhu B, Liang H, Fang C, Gong Y, *et al.* Characteristics of pediatric  
474 SARS-CoV-2 infection and potential evidence for persistent fecal viral shedding. *Nat Med*  
475 2020;**26**:502-5.
- 476 8 Jin X, Lian JS, Hu JH, Gao J, Zheng L, Zhang YM, *et al.* Epidemiological, clinical  
477 and virological characteristics of 74 cases of coronavirus-infected disease 2019 (COVID-19)  
478 with gastrointestinal symptoms. *Gut* 2020;**69**:1002-9.
- 479 9 Zuo T, Zhang F, Lui GCY, Yeoh YK, Li AYL, Zhan H, *et al.* Alterations in Gut  
480 Microbiota of Patients With COVID-19 During Time of Hospitalization. *Gastroenterology*  
481 2020;**159**:944-55 e8.
- 482 10 Yeoh YK, Zuo T, Lui GC, Zhang F, Liu Q, Li AY, *et al.* Gut microbiota composition  
483 reflects disease severity and dysfunctional immune responses in patients with COVID-19. *Gut*  
484 2021;**70**:698-706.
- 485 11 Middeldorp S, Coppens M, van Haaps TF, Foppen M, Vlaar AP, Muller MCA, *et al.*  
486 Incidence of venous thromboembolism in hospitalized patients with COVID-19. *J Thromb*  
487 *Haemost* 2020;**18**:1995-2002.
- 488 12 Klok FA, Kruip M, van der Meer NJM, Arbous MS, Gommers D, Kant KM, *et al.*  
489 Incidence of thrombotic complications in critically ill ICU patients with COVID-19. *Thromb*  
490 *Res* 2020;**191**:145-7.
- 491 13 Alhazzani W, Moller MH, Arabi YM, Loeb M, Gong MN, Fan E, *et al.* Surviving  
492 Sepsis Campaign: guidelines on the management of critically ill adults with Coronavirus  
493 Disease 2019 (COVID-19). *Intensive Care Med* 2020;**46**:854-87.
- 494 14 Legrand M, Bell S, Forni L, Joannidis M, Koyner JL, Liu K, *et al.* Pathophysiology of  
495 COVID-19-associated acute kidney injury. *Nat Rev Nephrol* 2021.
- 496 15 Brodin P. Immune determinants of COVID-19 disease presentation and severity. *Nat*  
497 *Med* 2021;**27**:28-33.
- 498 16 Hu B, Guo H, Zhou P, Shi ZL. Characteristics of SARS-CoV-2 and COVID-19. *Nat*  
499 *Rev Microbiol* 2021;**19**:141-54.
- 500 17 Kosiewicz MM, Zirnheld AL, Alard P. Gut microbiota, immunity, and disease: a  
501 complex relationship. *Front Microbiol* 2011;**2**:180.
- 502 18 Schirmer M, Smeekens SP, Vlamakis H, Jaeger M, Oosting M, Franzosa EA, *et al.*  
503 Linking the Human Gut Microbiome to Inflammatory Cytokine Production Capacity. *Cell*  
504 2016;**167**:1125-36 e8.

- 505 19 Rothschild D, Weissbrod O, Barkan E, Kurilshikov A, Korem T, Zeevi D, *et al.*  
506 Environment dominates over host genetics in shaping human gut microbiota. *Nature*  
507 2018;**555**:210-5.
- 508 20 Kau AL, Ahern PP, Griffin NW, Goodman AL, Gordon JI. Human nutrition, the gut  
509 microbiome and the immune system. *Nature* 2011;**474**:327-36.
- 510 21 Yatsunenkov T, Rey FE, Manary MJ, Trehan I, Dominguez-Bello MG, Contreras M, *et*  
511 *al.* Human gut microbiome viewed across age and geography. *Nature* 2012;**486**:222-7.
- 512 22 Mueller S, Saunier K, Hanisch C, Norin E, Alm L, Midtvedt T, *et al.* Differences in  
513 fecal microbiota in different European study populations in relation to age, gender, and  
514 country: a cross-sectional study. *Appl Environ Microbiol* 2006;**72**:1027-33.
- 515 23 McDonald D, Ackermann G, Khailova L, Baird C, Heyland D, Kozar R, *et al.*  
516 Extreme Dysbiosis of the Microbiome in Critical Illness. *mSphere* 2016;**1**.
- 517 24 World Health Organization R&D Blueprint. COVID-19 Therapeutic Trial Synopsis,  
518 <http://www.who.int/blueprint/priority-diseases/key-action/novel-coronavirus/en/> (Accessed  
519 August 11, 2021).
- 520 25 Cao B, Wang Y, Wen D, Liu W, Wang J, Fan G, *et al.* A Trial of Lopinavir-Ritonavir  
521 in Adults Hospitalized with Severe Covid-19. *N Engl J Med* 2020;**382**:1787-99.
- 522 26 Reitmeier S, Kiessling S, Neuhaus K, Haller D. Comparing Circadian Rhythmicity in  
523 the Human Gut Microbiome. *STAR Protoc* 2020;**1**:100148.
- 524 27 Edgar RC, Flyvbjerg H. Error filtering, pair assembly and error correction for next-  
525 generation sequencing reads. *Bioinformatics* 2015;**31**:3476-82.
- 526 28 Reitmeier S, Kiessling S, Clavel T, List M, Almeida EL, Ghosh TS, *et al.* Arrhythmic  
527 Gut Microbiome Signatures Predict Risk of Type 2 Diabetes. *Cell Host Microbe* 2020;**28**:258-  
528 72 e6.
- 529 29 Qin J, Li Y, Cai Z, Li S, Zhu J, Zhang F, *et al.* A metagenome-wide association study  
530 of gut microbiota in type 2 diabetes. *Nature* 2012;**490**:55-60.
- 531 30 Franzosa EA, Sirota-Madi A, Avila-Pacheco J, Fornelos N, Haiser HJ, Reinker S, *et*  
532 *al.* Gut microbiome structure and metabolic activity in inflammatory bowel disease. *Nat*  
533 *Microbiol* 2019;**4**:293-305.
- 534 31 Gopalakrishnan V, Helmink BA, Spencer CN, Reuben A, Wargo JA. The Influence of  
535 the Gut Microbiome on Cancer, Immunity, and Cancer Immunotherapy. *Cancer Cell*  
536 2018;**33**:570-80.
- 537 32 Agnes A, Puccioni C, D'Ugo D, Gasbarrini A, Biondi A, Persiani R. The gut  
538 microbiota and colorectal surgery outcomes: facts or hype? A narrative review. *BMC Surg*  
539 2021;**21**:83.
- 540 33 Ren Z, Wang H, Cui G, Lu H, Wang L, Luo H, *et al.* Alterations in the human oral and  
541 gut microbiomes and lipidomics in COVID-19. *Gut* 2021;**70**:1253-65.
- 542 34 Xie Y, Bowe B, Maddukuri G, Al-Aly Z. Comparative evaluation of clinical  
543 manifestations and risk of death in patients admitted to hospital with covid-19 and seasonal  
544 influenza: cohort study. *BMJ* 2020;**371**:m4677.
- 545 35 Atarashi K, Tanoue T, Ando M, Kamada N, Nagano Y, Narushima S, *et al.* Th17 Cell  
546 Induction by Adhesion of Microbes to Intestinal Epithelial Cells. *Cell* 2015;**163**:367-80.
- 547 36 Honda K, Littman DR. The microbiota in adaptive immune homeostasis and disease.  
548 *Nature* 2016;**535**:75-84.
- 549 37 Mortha A, Chudnovskiy A, Hashimoto D, Bogunovic M, Spencer SP, Belkaid Y, *et al.*  
550 Microbiota-dependent crosstalk between macrophages and ILC3 promotes intestinal  
551 homeostasis. *Science* 2014;**343**:1249288.
- 552 38 Sokol H, Pigneur B, Watterlot L, Lakhdari O, Bermudez-Humaran LG, Gratadoux JJ,  
553 *et al.* Faecalibacterium prausnitzii is an anti-inflammatory commensal bacterium identified by  
554 gut microbiota analysis of Crohn disease patients. *Proc Natl Acad Sci U S A* 2008;**105**:16731-  
555 6.

- 556 39 Lopez-Siles M, Duncan SH, Garcia-Gil LJ, Martinez-Medina M. Faecalibacterium  
557 prausnitzii: from microbiology to diagnostics and prognostics. *ISME J* 2017;**11**:841-52.
- 558 40 Parker BJ, Wearsch PA, Veloo ACM, Rodriguez-Palacios A. The Genus Alistipes:  
559 Gut Bacteria With Emerging Implications to Inflammation, Cancer, and Mental Health. *Front*  
560 *Immunol* 2020;**11**:906.
- 561 41 Kelly TN, Bazzano LA, Ajami NJ, He H, Zhao J, Petrosino JF, *et al.* Gut Microbiome  
562 Associates With Lifetime Cardiovascular Disease Risk Profile Among Bogalusa Heart Study  
563 Participants. *Circ Res* 2016;**119**:956-64.
- 564 42 Wang Z, Klipfell E, Bennett BJ, Koeth R, Levison BS, Dugar B, *et al.* Gut flora  
565 metabolism of phosphatidylcholine promotes cardiovascular disease. *Nature* 2011;**472**:57-63.
- 566 43 Liu Y, Dai M. Trimethylamine N-Oxide Generated by the Gut Microbiota Is  
567 Associated with Vascular Inflammation: New Insights into Atherosclerosis. *Mediators*  
568 *Inflamm* 2020;**2020**:4634172.
- 569 44 Roberts AB, Gu X, Buffa JA, Hurd AG, Wang Z, Zhu W, *et al.* Development of a gut  
570 microbe-targeted nonlethal therapeutic to inhibit thrombosis potential. *Nat Med*  
571 2018;**24**:1407-17.
- 572 45 Newsome RC, Gauthier J, Hernandez MC, Abraham GE, Robinson TO, Williams HB,  
573 *et al.* The gut microbiome of COVID-19 recovered patients returns to uninfected status in a  
574 minority-dominated United States cohort. *Gut Microbes* 2021;**13**:1-15.
- 575 46 Gu S, Chen Y, Wu Z, Chen Y, Gao H, Lv L, *et al.* Alterations of the Gut Microbiota in  
576 Patients With Coronavirus Disease 2019 or H1N1 Influenza. *Clin Infect Dis* 2020;**71**:2669-  
577 78.
- 578 47 Otani S, Chihade DB, Coopersmith CM. Critical illness and the role of the  
579 microbiome. *Acute Med Surg* 2019;**6**:91-4.
- 580

582 **Figure and Table Legends**

583 **Figure 1 Microbial Composition of the Gut Observed in the Cohort**

584 **A** Overview of study design. Stool and saliva samples are indicated. **B** *Alpha*-diversity of all  
585 samples of all patients. Left histogram shows richness and right histogram Shannon effective  
586 number of species. **C** Phylogenetic tree calculated by generalized Unifrac distances for all  
587 samples of all patients. Stacked barplots show taxonomic distribution on phyla level. Inner label  
588 shows SARS-CoV-2 status and outer label indicates the sampling time phase. **D** Left, *alpha*-  
589 diversity stratified according to SARS-CoV-2 status for all samples of all patients, showing  
590 Shannon effective numbers and richness. Right, barplots show effect modifiers significantly  
591 contributing to microbial diversity in all samples. Y-axis shows the  $R^2$  value calculated based  
592 on Bray-Curtis distance for COVID-19, post COVID-19 and SC.

593

594 **Figure 2 Microbial Profile of the Gut is Associated with Disease Severity**

595 **A** MDS plot calculated on generalized UniFrac distance stratifying all patients (samples from  
596 the first time point, T1, only) according to disease severity. **B** Heatmap shows significant  
597 different taxa between COVID-19, post COVID-19 and SC patients with a different disease  
598 severity in correlation to inflammatory biomarkers. WBC, CRP and PCT. Boxplots show  
599 significantly different taxa according to disease severity. *Fusicatenibacter* shows differences in  
600 prevalence ( $p$ -value = 0.02), the genus *Parabacteroides* and phylum Protobacteria are  
601 significantly different in their relative abundance ( $p$ -value  $\leq$  0.001). **C** Dendrogram shows  
602 generalized UniFrac distances between a subset of COVID-19 and post COVID-19 patients,  
603 fulfilling certain criteria of a high inflammatory and severe disease, and AC for the sampling at  
604 T1. Stacked barplots display the relative abundance values of bacteria most significantly  
605 different.

606

607 **Figure 3 Association Between Gut Bacterial Composition and Common Complications**



608 **A** MDS plot calculated on generalized UniFrac distance stratifying COVID-19 and post  
609 COVID-19 patients, SC and AC (T1) according to the number of complications during  
610 hospitalization. **B** Same samples as in panel A, boxplots show significant differences in *alpha*-  
611 diversity and relative abundance of taxa. *Faecalibacterium* shows differences in prevalence (p-  
612 value = 0.0002) and relative abundance (p-value  $\leq$  0.01), *Parabacteroides* and *Alistipes* are  
613 significantly different in their relative abundance (p-value  $\leq$  0.01). **C** Heatmap with taxa found  
614 to be significantly different in COVID-19, post COVID-19 and SC patients (T1) and with  
615 specific complications. Values are showing the mean relative abundance detected in patients  
616 with the complication compared to patients without complication. The color code indicates high  
617 (green) or low (white) relative abundance. **D** Multivariate permutational analysis revealed the  
618 importance of complications regarding microbial composition. Barplots are showing the  $R^2$   
619 values. Green bars = significant variables (\*,  $p \leq 0.05$ , \*\*,  $p \leq 0.01$ ; \*\*\*,  $p \leq 0.001$ ), grey =  
620 non-significant variables.

621

622 **Figure 4 Stability of the Bacterial Composition Related to COVID-19 and Longitudinal**  
623 **Analysis**

624 **A** Intra-individual generalized UniFrac distance sorted by median distance within one patient.  
625 Longitudinal sampling of at least two samples per patient with a medium of 3.5 (COVID-19),  
626 4.6 (post COVID-19), and 2.3 (SC) samples per patient. Each box represents one patient.  
627 Dashed line shows the mean intra-individual distance over all patients (N = 39). Right color bar  
628 shows variables related to hospitalization as indicated by the legend. **B** MDS plot calculated on  
629 generalized UniFrac distances stratifying COVID-19, post COVID-19 and SC patients (all  
630 sampling time points) according to number of complications. **C** Intra-individual generalized  
631 UniFrac distances sorted by median distance within one patient of the COVID-19 cohort with  
632 a minimum of two samples (N = 25). Each box represents one patient. **D** MDS plot calculated  
633 on generalized UniFrac distance stratifying COVID-19 and post COVID-19 patients (all

634 sampling time points) for disease progression in severe (S-prog) compared to patients not  
635 meeting these criteria (NS-prog). **E** Individual relative abundance values of random forest  
636 selected zOTUs for classification of severe disease progression grouped by SARS-CoV-2  
637 status. ROC curve shows differentiation by mortality based on previously determined feature  
638 list.

639

#### 640 **Supplementary Figure 1 Microbial Profile of Sputum Samples**

641 **A** Upper plot shows the taxonomic distribution based on phyla level over all patients (T1).  
642 Stacked barplots represent phyla composition stratified by SARS-CoV-2 status. **B-D** MDS plot  
643 calculated on generalized UniFrac distance stratifying at T1 according to **B** SARS-CoV-2  
644 status, **C** disease severity, **D** number of complications during hospitalization.

645

#### 646 **Table 1 Demographic and Clinical Characteristics of the Study Population**

647

648 **Supplementary Table 1 Classification of the Antibiotic Therapy given to Patients during**  
649 **their Inpatient Stay**

650

651 **Supplementary Table 2 Results of Confounding Analysis**

652

653 **Supplementary Table 3 Distribution of Factors with Possible Impact on the Gut**

654 **Microbiota**

655

656 **Supplementary Table 4 Antibiotics and Intensive Care According to COVID-19 Severity**  
657 **and Complications**

658

659 **Supplementary Table 5 Taxonomic Classification of zOTUs in Fecal Samples**

660

661 **Supplementary Table 6 Taxonomic Classification of zOTUs in Saliva Samples**

662

**a**

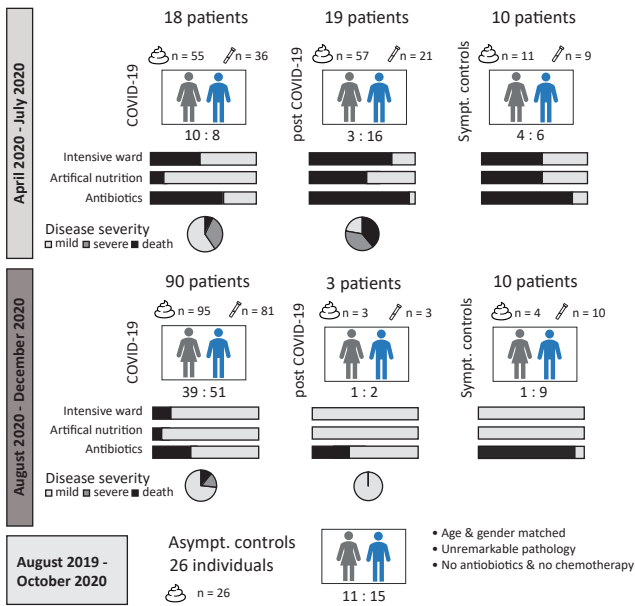

**c**

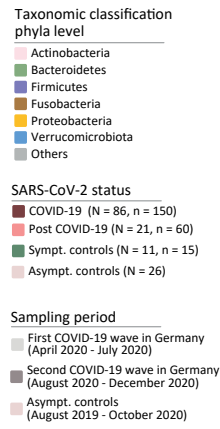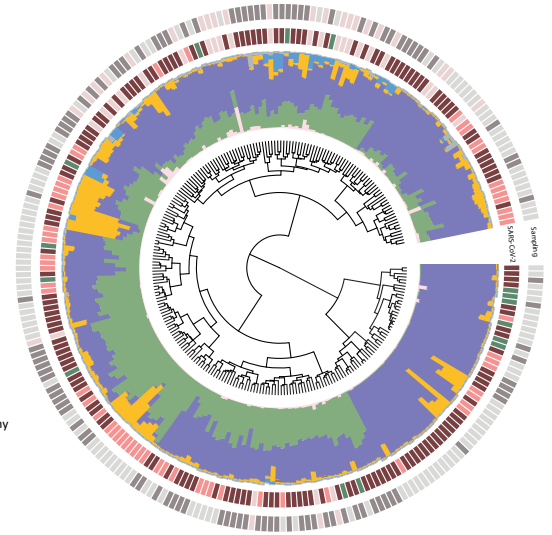

**b**

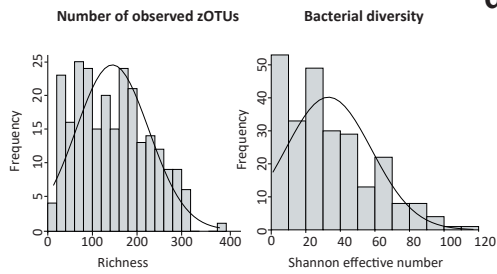

**d**

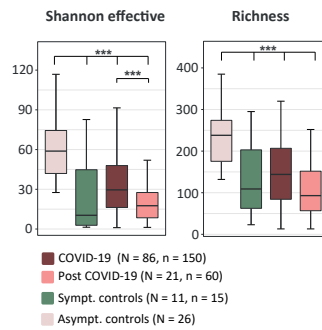

**Covariables explaining differences in microbial composition**

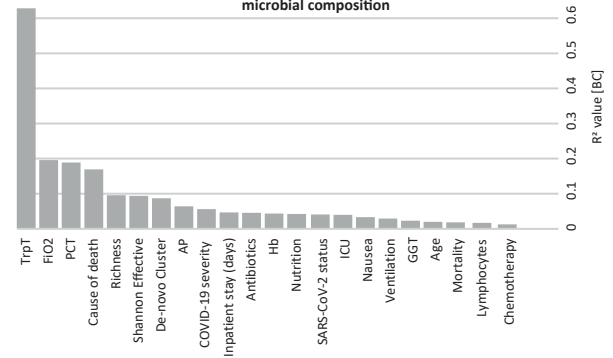

a

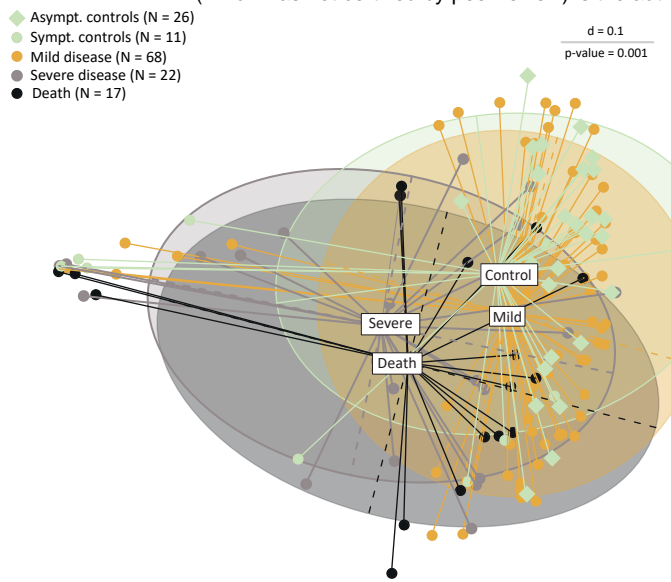

b

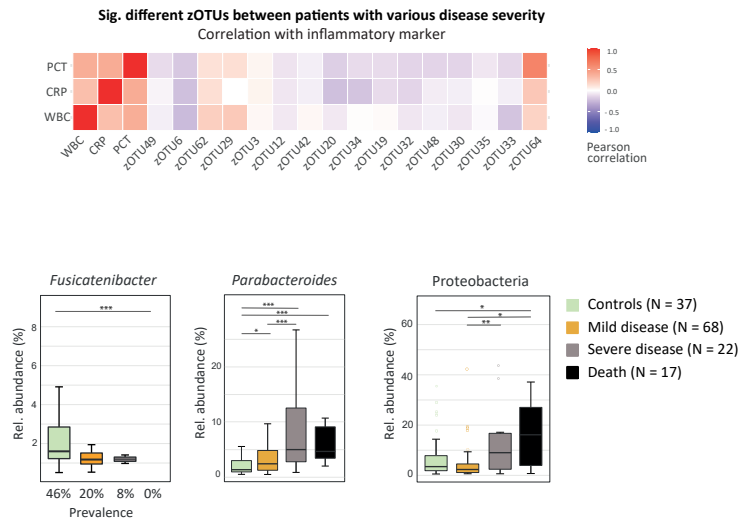

c

Sig. different genera

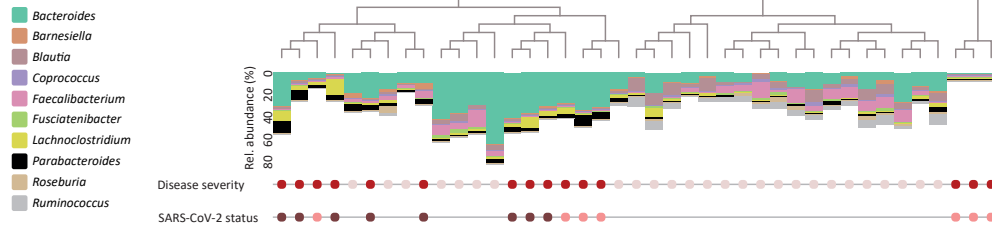

Disease severity and SARS-CoV-2 status

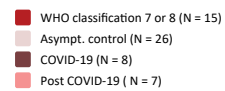

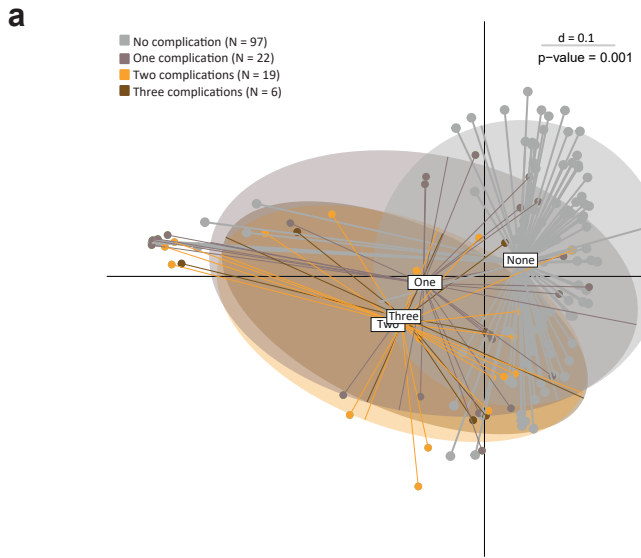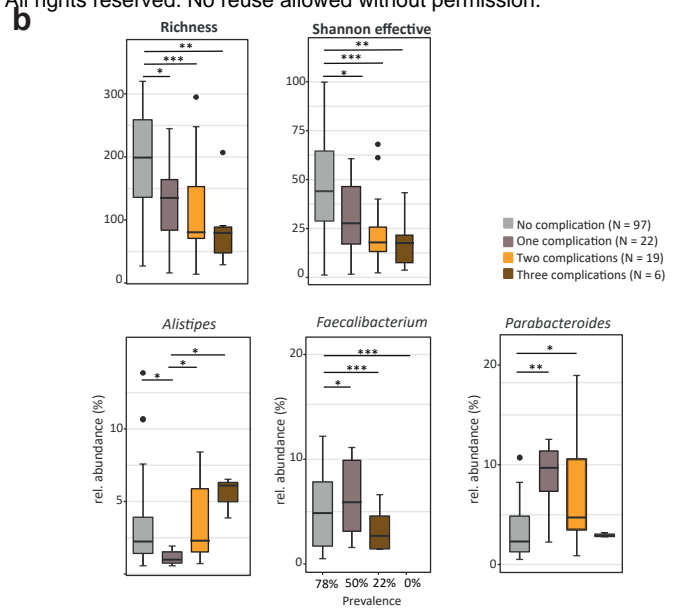

**c**

Sig. differences between complications

| Complication               | ARDS |      | AKI |      | Hemodialysis |      | VTE/PE |      | Cardiac event |      | Mortality |      |
|----------------------------|------|------|-----|------|--------------|------|--------|------|---------------|------|-----------|------|
|                            | no   | yes  | no  | yes  | no           | yes  | no     | yes  | no            | yes  | no        | yes  |
| Richness                   | 182  | 112  | 183 | 126  | 171          | 103  | ns     | ns   | ns            | ns   | ns        | ns   |
| Shannon effective counts   | 43   | 22   | 43  | 27   | 40           | 19   | ns     | ns   | 51            | 24   | ns        | ns   |
| <i>Faecalibacterium</i>    | 3.93 | 1.45 | 4   | 0.99 | 3.67         | 0.41 | ns     | ns   | 5.85          | 0    | 3.55      | 0.25 |
| <i>Akkermansia</i>         | 2.54 | 1    | ns  | ns   | ns           | ns   | ns     | ns   | ns            | ns   | ns        | ns   |
| <i>Blautia</i>             | 4.22 | 1.95 | ns  | ns   | 3.78         | 2.36 | ns     | ns   | 5.01          | 1.07 | 4.01      | 1    |
| <i>Dialister</i>           | ns   | ns   | ns  | ns   | ns           | ns   | 1.81   | 0.85 | ns            | ns   | ns        | ns   |
| <i>Escherichia coli</i>    | 1.93 | 3.78 | ns  | ns   | ns           | ns   | ns     | ns   | ns            | ns   | ns        | ns   |
| <i>Eubacterium</i>         | ns   | ns   | ns  | ns   | ns           | ns   | 1.82   | 0.73 | ns            | ns   | ns        | ns   |
| <i>Lachnoastrostridium</i> | ns   | ns   | ns  | ns   | 3.66         | 5.4  | ns     | ns   | ns            | ns   | 4         | 3.77 |
| <i>Oscillibacter</i>       | ns   | ns   | ns  | ns   | ns           | ns   | ns     | ns   | 1.34          | 3.01 | ns        | ns   |
| <i>Parabacteroides</i>     | 2.71 | 4.74 | ns  | ns   | 3.02         | 5.07 | ns     | ns   | ns            | ns   | 3.1       | 4.48 |
| <i>Ruminococcus</i>        | 2.32 | 0.56 | ns  | ns   | ns           | ns   | ns     | ns   | ns            | ns   | ns        | ns   |
| <i>Sellimonas</i>          | ns   | ns   | ns  | ns   | ns           | ns   | ns     | ns   | ns            | ns   | ns        | ns   |
| <i>Tyzerella</i>           | ns   | ns   | ns  | ns   | ns           | ns   | 0.29   | 4.18 | ns            | ns   | ns        | ns   |
| zOTU12                     | ns   | ns   | ns  | ns   | ns           | ns   | 3.33   | 0    | ns            | ns   | ns        | ns   |
| zOTU18                     | ns   | ns   | ns  | ns   | ns           | ns   | 2.38   | 0.67 | ns            | ns   | ns        | ns   |
| zOTU19                     | ns   | ns   | ns  | ns   | 1.01         | 0    | ns     | ns   | ns            | ns   | ns        | ns   |
| zOTU20                     | ns   | ns   | ns  | ns   | 1.01         | 0    | ns     | ns   | ns            | ns   | ns        | ns   |
| zOTU3                      | 1.93 | 3.78 | ns  | ns   | ns           | ns   | ns     | ns   | ns            | ns   | ns        | ns   |
| zOTU30                     | ns   | ns   | 0   | 1.01 | 0.9          | 0    | ns     | ns   | ns            | ns   | ns        | ns   |
| zOTU36                     | ns   | ns   | ns  | ns   | ns           | ns   | ns     | ns   | 1.25          | 2.83 | ns        | ns   |
| zOTU6                      | 1.61 | 0    | ns  | ns   | ns           | ns   | ns     | ns   | ns            | ns   | 1.38      | 0.17 |

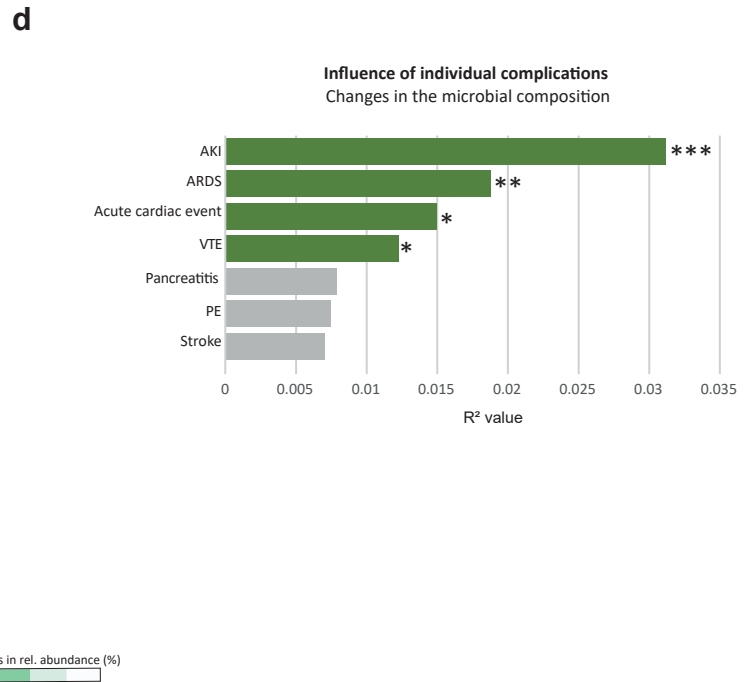

**a**

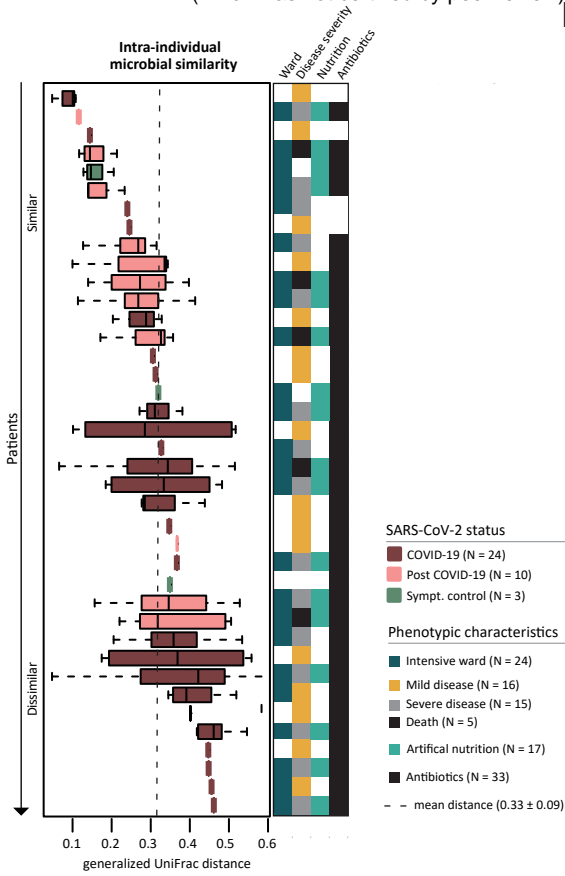

**b**

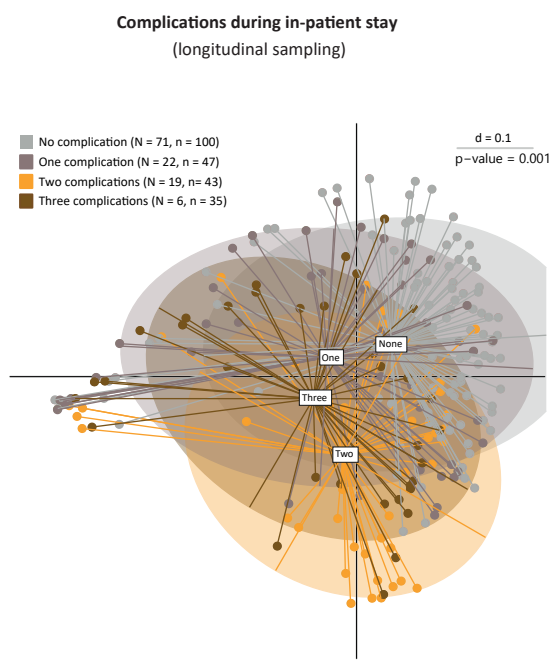

**c**

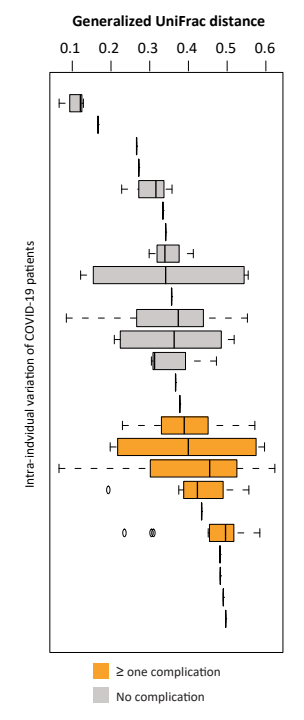

**d**

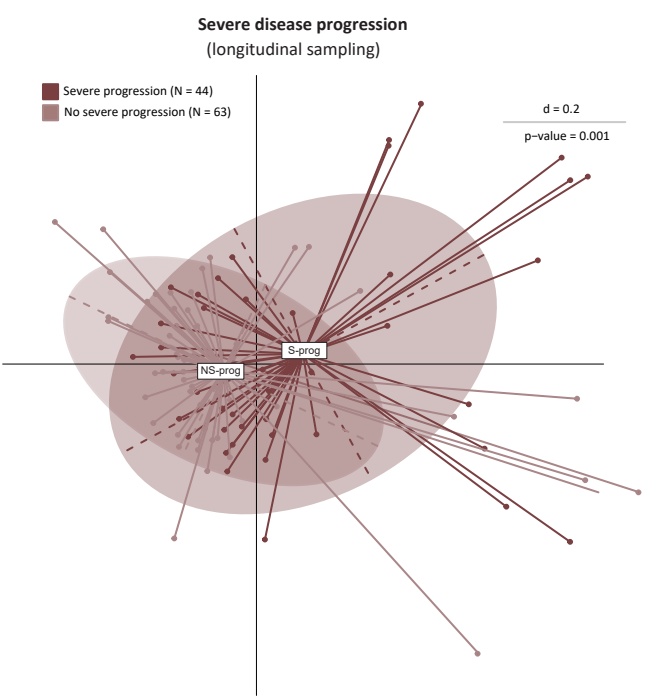

**e**

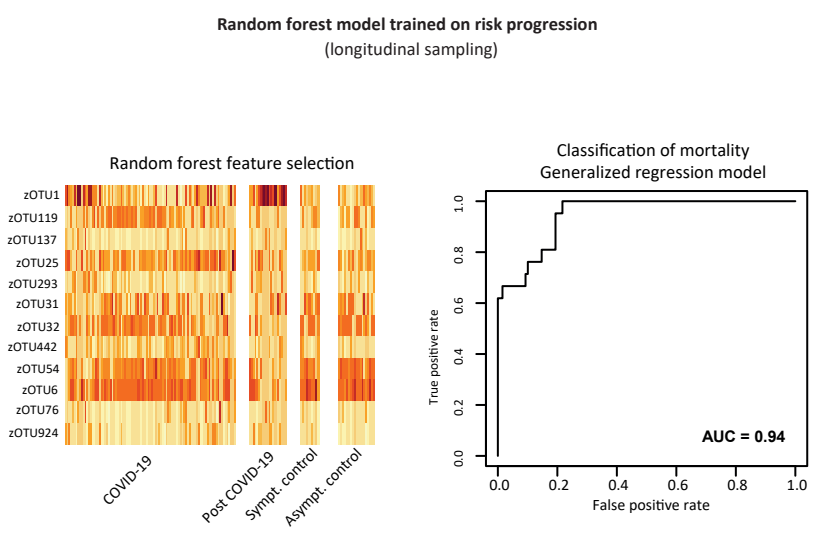

|                                                    | COVID-19  | POST COVID-19 | SC      | AC       |
|----------------------------------------------------|-----------|---------------|---------|----------|
| <i>NUMBER OF PATIENTS (N)</i>                      | 108       | 22            | 20      | 26       |
| <i>STOOL SAMPLES (N)</i>                           | 150       | 60            | 15      | 26       |
| <i>PATIENTS WITH SERIAL STOOL SAMPLES (N)</i>      | 25        | 11            | 3       | 0        |
| <i>SALIVA SAMPLES (N)</i>                          | 117       | 24            | 19      | 0        |
| <i>PATIENTS WITH SERIAL SALIVA SAMPLES (N)</i>     | 15        | 5             | 2       | 0        |
| <i>GENDER (FEMALES:MALES)</i>                      | 49:59     | 4:18          | 5:15    | 11:15    |
| <i>AGE (YEARS, MEAN, SD)</i>                       | 62 (15)   | 65 (13)       | 64 (17) | 63 (12)  |
| <i>COMORBIDITIES (N, %)</i>                        |           |               |         |          |
| HYPERTENSION                                       | 43 (39.8) | 14 (63.6)     | 9 (45)  | 4 (15.4) |
| DIABETES MELLITUS II                               | 19 (17.6) | 5 (22.7)      | 3 (15)  | 3 (11.5) |
| CORONARY HEART DISEASE                             | 16 (14.8) | 3 (13.6)      | 8 (40)  | 1 (3.8)  |
| CHRONIC KIDNEY DISEASE                             | 9 (8.3)   | 7 (31.8)      | 3 (15)  | 1 (3.8)  |
| CANCER                                             | 9 (8.3)   | 3 (13.6)      | 5 (25)  | 0 (0)    |
| CHRONIC OBSTRUCTIVE LUNG DISEASE                   | 5 (4.6)   | 1 (4.5)       | 1 (5)   | 0 (0)    |
| CHRONIC HEART FAILURE                              | 5 (4.6)   | 0 (0)         | 4 (20)  | 0 (0)    |
| DIVERTICULAR DISEASE                               | 4 (3.7)   | 1 (4.5)       | 0 (0)   | 12 (46)  |
| S.P. INTESTINAL RESECTION                          | 4 (3.7)   | 0 (0)         | 0 (0)   | 1 (3.8)  |
| RHEUMATIC DISEASE                                  | 4 (3.7)   | 2 (9)         | 1 (5)   | 1 (3.8)  |
| INFLAMMATORY BOWEL DISEASE                         | 3 (2.8)   | 0 (0)         | 0 (0)   | 0 (0)    |
| GASTRITIS                                          | 3 (2.8)   | 1 (4.5)       | 0 (0)   | 4 (15.4) |
| REFLUX DISEASE                                     | 2 (1.9)   | 1 (4.5)       | 0 (0)   | 1 (3.8)  |
| <i>SYMPTOMS AT ADMISSION (N, %)</i>                |           |               |         |          |
| COUGH                                              | 69 (63.9) | 13 (5.9)      | 7(35)   | 0 (0)    |
| FEVER                                              | 63 (58.3) | 15 (68.2)     | 6 (30)  | 0 (0)    |
| DYSPNOEA                                           | 52 (48)   | 9 (10.9)      | 9 (45)  | 0 (0)    |
| DIARRHEA                                           | 18 (16.7) | 7 (31.8)      | 0 (0)   | 0 (0)    |
| ANOSMIA/AGEUSIA                                    | 17(15.7)  | 1 (4.5)       | 0 (0)   | 0 (0)    |
| NAUSEA                                             | 17 (15.7) | 6 (27.3)      | 1 (5)   | 0 (0)    |
| <i>COMPLICATIONS DURING HOSPITALIZATION (N, %)</i> |           |               |         |          |
| ACUTE RESPIRATORY DISTRESS SYNDROME                | 21 (19.4) | 13 (59)       | 2 (10)  | 0 (0)    |
| ACUTE KIDNEY INJURY                                | 17 (15.7) | 12 (54.5)     | 4 (20)  | 0 (0)    |
| ACUTE CARDIAC EVENT                                | 2 (1.9)   | 1 (4.5)       | 0 (0)   | 0 (0)    |



|                                                  |           |           |         |         |
|--------------------------------------------------|-----------|-----------|---------|---------|
| ACUTE PULMONARY EMBOLISM                         | 4 (3.7)   | 0 (0)     | 0 (0)   | 0 (0)   |
| SHOCK                                            | 3 (2.8)   | 3 (13.6)  | 1 (5)   | 0 (0)   |
| PANCREATITIS                                     | 2 (1.9)   | 0 (0)     | 0 (0)   | 0 (0)   |
| VENOUS THROMBOEMBOLISM                           | 3 (2.8)   | 1 (4.5)   | 1 (5)   | 0 (0)   |
| STROKE                                           | 1 (0.9)   | 0 (0)     | 1 (5)   | 0 (0)   |
| <i>SECONDARY INFECTIONS (N, %)</i>               | 54 (50)   | 19 (86.4) | 10 (50) | 0 (0)   |
| <i>ANTIBIOTICS (N, %)</i>                        | 54 (50)   | 19 (86.4) | 17 (85) | 0 (0)   |
| <i>OXYGEN SUPPORT WITHOUT VENTILATION (N, %)</i> | 44 (40.7) | 3 (13.6)  | 6 (30)  | 0 (0)   |
| <i>VENTILATION SUPPORT (N, %)</i>                | 24 (22.2) | 14 (63.6) | 5 (25)  | 0 (0)   |
| <i>ARTIFICIAL NUTRITION (N, %)</i>               | 17(16)    | 12 (54.5) | 5 (25)  | 0 (0)   |
| <i>INTENSIVE CARE (N, %)</i>                     | 30 (27.8) | 15 (68.2) | 5 (25)  | 0 (0)   |
| <i>IMMUNOSUPPRESSION (N, %)</i>                  | 40 (37)   | 5 (22.7)  | 3 (15)  | 2 (7.7) |
| <i>SPECIFIC CANCER THERAPY (N, %)</i>            | 5 (4.6)   | 2 (9)     | 2 (10)  | 0 (0)   |
| <i>SPECIFIC SARS-COV-2-TREATMENT (N, %)</i>      |           |           |         |         |
| REMDESIVIR                                       | 15 (13.9) | 4 (18.2)  | 0 (0)   | 0 (0)   |
| CONVALESCENT PLASMA                              | 5 (4.6)   | 1 (4.5)   | 0 (0)   | 0 (0)   |
| INTRAVENOUS IMMUNOGLOBULINS                      | 1 (0.9)   | 0 (0)     | 0 (0)   | 0 (0)   |
| BARICITINIB                                      | 1 (0.9)   | 0 (0)     | 0 (0)   | 0 (0)   |
